# Supplementary material for: With a little help from DNA barcoding: investigating the diversity of Gastropoda from the Portuguese coast
Source: PubMed Central journal article supplement (PMC4753432; doi:10.1038/srep20226), 2016-02-15
Supplement: srep20226-s1.pdf [file srep20226-s1.pdf]

## With a little help from DNA barcoding: investigating the diversity of Gastropoda from the Portuguese coast

Luísa M. S. Borges, Claudia Hollatz, Jorge Lobo, Ana M. Cunha, Ana P. Vilela, Gonçalo Calado, Rita Coelho, Ana C. Costa, Maria S. G. Ferreira, Maria H. Costa, Filipe O. Costa

| Species name<br>(no. of specimens) | GenBank accession no.                     | BOLD ID no.                                                                 | source                                                                    |
|------------------------------------|-------------------------------------------|-----------------------------------------------------------------------------|---------------------------------------------------------------------------|
| <i>Acmae mitra</i> (1)             | AB238459                                  |                                                                             | Nakano & Ozawa, 2007                                                      |
| <i>Armina maculata</i> (3)         | KF369111                                  | <b>LMBRR022; LMBRR023</b>                                                   | This study; Lobo <i>et al.</i> , 2013                                     |
| <i>Berthella plumula</i> (3)       | KF369114;KF369115                         | <b>LMBSCt6-002</b>                                                          | This study; Lobo <i>et al.</i> , 2013                                     |
| <i>Berghia columbina</i> (1)       | JX087544                                  |                                                                             | Carmona <i>et al.</i> , 2012                                              |
| <i>Berghia verrucicornis</i> (6)   | HQ616750; JX087553;<br>JX087554           | <b>LMBAG34-001; LMBAG34-002; LMBAG34-003</b>                                | This study; Carmona <i>et al.</i> , 2011;<br>Carmona <i>et al.</i> , 2012 |
| <i>Calliostoma</i> sp. (1)         |                                           | LMBAG35-001                                                                 | This study                                                                |
| <i>Calliostoma virescens</i> (2)   |                                           | LMBAG35-002; LMBAG35-003                                                    | This study                                                                |
| <i>Calliostoma zizyphinum</i> (6)  | KR084610; KR054821;<br>KR084401           | <b>TR1-15; TR2-14; TR2-16</b>                                               | This study; Barco <i>et al.</i> , 2015                                    |
| <i>Cingula trifasciata</i> (2)     |                                           | LMBAG12-002; LMBAG12-003                                                    | This study                                                                |
| <i>Crepidula fornicata</i> (3)     | AF353131; HM884254                        | <b>AVP104</b>                                                               | This study; Colin, 2001                                                   |
| <i>Euspira nitida</i> (2)          | EU332641                                  | <b>TR1-26</b>                                                               | This study; Huelsken <i>et al.</i> , 2008                                 |
| <i>Gibbula cineraria</i> (6)       | AM049339; KJ183016                        | <b>LMBAG22-001; LMBAG22-002; LMBAG22-004; LMBAG22-005</b>                   | This study; Williams & Ozawa, 2006;<br>Cowart <i>et al.</i> , 2014        |
| <i>Gibbula delgadensis</i> (3)     |                                           | LMBAG9-001; LMBAG9-002; LMBAG9-003                                          | This study                                                                |
| <i>Gibbula</i> sp. (4)             |                                           | LMBV4-001; LMBV4-002; LMBV4-004; LMBV4-005                                  | This study                                                                |
| <i>Gibbula pennanti</i> (1)        | GQ232365                                  |                                                                             | Williams <i>et al.</i> , 2010                                             |
| <i>Gibbula umbilicalis</i> (10)    | JN686278; JN6863765;<br>JN686273,GQ232367 | <b>LMBAG36-001; LMBAG36-002; LMBAP3-001; LMBAP3-002;<br/>AVP029; AVP069</b> | This study; Donald <i>et al.</i> , 2012; Williams<br><i>et al.</i> , 2010 |

| <b>Species name<br/>(no. of specimens)</b> | <b>GenBank accession no.</b>                                     | <b>BOLD ID no.</b>                                              | <b>source</b>                                                                                              |
|--------------------------------------------|------------------------------------------------------------------|-----------------------------------------------------------------|------------------------------------------------------------------------------------------------------------|
| Gibbula umbilicaris (1)                    | JQ839383                                                         |                                                                 | Barco et al., 2013a                                                                                        |
| Gibbula varia (4)                          | JQ839392; JQ839395;<br>JX887429; JX887427                        |                                                                 | Barco et al., 2013a                                                                                        |
| <i>Hexaplex trunculus</i> (5)              | AM712610; AM712613;<br>KF297431; EU391577                        | <b>LMBAG28-001</b>                                              | This study; Claremont et al., 2008;<br>Gonzalez-Tizon et al., 2011; Vilamor et al., 2014                   |
| <i>Jujubinus exasperatus</i> (1)           | GQ232368                                                         |                                                                 | Williams et al., 2010                                                                                      |
| <i>Jujubinus pseudogravinae</i> (1)        |                                                                  | LMBAG14-001                                                     | This study                                                                                                 |
| <i>Littorina arcana</i> (1)                | HE590832                                                         |                                                                 | Reid, Dyal & Williams, 2012                                                                                |
| <i>Littorina compressa</i> (1)             | HE590834                                                         |                                                                 | Reid, Dyal & Williams, 2012                                                                                |
| <i>Littorina fabalis</i> (1)               | HE590835                                                         |                                                                 | Reid, Dyal & Williams, 2012                                                                                |
| <i>Littorina littorea</i> (3)              | EU876085                                                         | <b>LMBAG7-002; LMBAG7-003</b>                                   | This study; Blakeslee et al., 2008                                                                         |
| <i>Littorina obtusata</i> (4)              | KF643904; AJ622947                                               | <b>LMBV18-003; LMBV18-005</b>                                   | This study; Layton et al., 2014; Williams & Reid, 2004                                                     |
| <i>Littorina saxatilis</i> (5)             | KF643665; JN241971                                               | <b>LMBV17-002; LMBV17-003; LMBV18-004</b>                       | This study; Layton et al., 2014; Prado-Sanchez et al., 2011                                                |
| <i>Lottia fascicularis</i> (1)             | AF130120                                                         |                                                                 | Simison & Lindberg, unpublished                                                                            |
| <i>Lottia gigantea</i> (1)                 | AB238466                                                         |                                                                 | Nakano & Ozawa, 2007                                                                                       |
| <i>Lottia strigatella</i> (1)              | AF295539                                                         |                                                                 | Simison & Lindberg, unpublished                                                                            |
| <i>Mitra cornea</i> (2)                    |                                                                  | LMBSM2-002; LMBSM2-002                                          | This study                                                                                                 |
| <i>Nassarius incrassatus</i> (7)           | NEOGA1001; NEOGA1002;<br>NEOGA1003 (BOLD system)                 | <b>LMBSM3-002; LMBSM3-003; LMBSM3-004; LMBV2-009</b>            | This study; Puillandre & Gofas, unpublished                                                                |
| <i>Nassarius reticulatus</i> (7)           | KJ183015; KF369156;<br>KF369157 ;EU827201                        | <b>LMBV2-004; LMBV10-001; LMBAG20-001</b>                       | This study; Cowart et al, 2014; Lobo et al., 2013; Cunha et al., 2008                                      |
| <i>Niveotectura pallida</i> (1)            | AB238494                                                         |                                                                 | Nakano & Ozawa, 2007                                                                                       |
| <i>Nucella lapillus</i> (9)                | DQ501718; FN651945;<br>EU391582; KF644222                        | <b>LMBAG19-001; LMBV7-001; LMBV7-002; LMBV7-003; LMBAP4-001</b> | This study; Guerra-Varela et al., 2007;<br>Barco et al., 2009; Claremont et al., 2008; Layton et al., 2014 |
| <i>Ocenebra erinaceus</i> (6)              | KF369161; KF369162;<br>KF369163                                  | <b>LMBV1-001 LMBV1-003 LMBV1-004</b>                            | This study; Lobo et al., 2013                                                                              |
| <i>Ocenebrina aciculata</i> (6)            | KF199911; KF199917;<br>KF199916; FR851900;<br>FR851905; FR851906 |                                                                 | Barco et al., 2013                                                                                         |

| <b>Species name<br/>(no. of specimens)</b> | <b>GenBank accession no.</b>                                        | <b>BOLD ID no.</b>                                                                                                                          | <b>source</b>                                                                                                            |
|--------------------------------------------|---------------------------------------------------------------------|---------------------------------------------------------------------------------------------------------------------------------------------|--------------------------------------------------------------------------------------------------------------------------|
| <i>Ocinebrina edwardsii</i> (6)            | KF153478; KF153443;<br>KF153303; KF153263<br>KC883664; KF153274;    | <b>LMBAG23-001; LMBAG23-002</b>                                                                                                             | This study; Barco <i>et al.</i> , 2013                                                                                   |
| <i>Ocinebrina hispidula</i> (3)            | KF153302<br>KF153316; KF153394;                                     |                                                                                                                                             | Barco <i>et al.</i> , 2013                                                                                               |
| <i>Ocinebrina ingloria</i> (3)             | KF153437                                                            |                                                                                                                                             | Barco <i>et al.</i> , 2013                                                                                               |
| <i>Ocinebrina leukos</i> (1)               | KF153286                                                            |                                                                                                                                             | Barco <i>et al.</i> , 2013                                                                                               |
| <i>Ocinebrina lurida</i> (1)               | KF643785                                                            |                                                                                                                                             | Layton <i>et al.</i> , 2014                                                                                              |
| <i>Ocinebrina miscowichae</i> (3)          | KF153346; KF153350;<br>KF153417<br>KF153446; KF153281;              |                                                                                                                                             | Barco <i>et al.</i> , 2013                                                                                               |
| <i>Ocinebrina nicolai</i> (3)              | KF153434                                                            |                                                                                                                                             | Barco <i>et al.</i> , 2013                                                                                               |
| <i>Ocinebrina piantonii</i> (1)            | KF153271                                                            |                                                                                                                                             | Barco <i>et al.</i> , 2013                                                                                               |
| <i>Ocinebrina</i> sp. (1)                  |                                                                     | LMBS12                                                                                                                                      | This study                                                                                                               |
| <i>Patella aspera</i> (6)                  | EF462971; EF462966<br>DQ089564; DQ089570;                           | <b>LMBT5-001 LMBT5-002 LMBT5-003; LMBSM5-001<br/>LMBT1-001; LMBT1-003; LMBT1-004; LMBSM8-001;<br/>LMBSM8-002; LMBSM8-003</b>                | This study; Borrell <i>et al.</i> , 2007<br>This study; Sá-Pinto <i>et al.</i> , 2008; Sá-<br>Pinto <i>et al.</i> , 2005 |
| <i>Patella candei</i> (9)                  | DQ089573                                                            | <b>LMBAG33-001; LMBAG33-002; LMBAG25-001; LMBAG25-<br/>002; LMBAG25-003; LMBAP1-001, LMBAP1-002</b>                                         | This study; Munoz-Comenero <i>et al.</i> ,<br>2011                                                                       |
| <i>Patella depressa</i> (9)                | JF937119; JF937155                                                  |                                                                                                                                             | Nakano & Ozawa, 2007                                                                                                     |
| <i>Patella ferruginea</i> (1)              | AB238578                                                            |                                                                                                                                             |                                                                                                                          |
| <i>Patella pellucida</i> (2)               | DQ089620                                                            | <b>LMBV15-001</b>                                                                                                                           | This study; Sá-Pinto <i>et al.</i> , 2005                                                                                |
| <i>Patella rustica</i> (1)                 | AB238579<br>HF547539; HF547517;                                     |                                                                                                                                             | Nakano & Ozawa, 2007<br>This study; Sá-Pinto <i>et al.</i> , 2008; Sá-<br>Pinto <i>et al.</i> , 2005                     |
| <i>Patella ulyssiponensis</i> (7)          | HF547528; DQ089596                                                  | <b>LMBV9-001, LMBV9-002; LMBV9-003<br/>LMBV22-001; LMBV22-002; LMBV23-001; LMBV23-002;<br/>LMBV23-003; LMBV24-001</b>                       | This study; Munoz-Comenero <i>et al.</i> ,<br>2011; Nakano & Ozawa, 2007                                                 |
| <i>Patella vulgata</i> (8)                 | JF937168; AB238589                                                  | <b>LMBAG4-003; LMBAG21-001; LMBAG21-002; LMBAG21-003;<br/>LMBAG32-001; LMBAG32-002; LMBAG32-003; LMBAG38-<br/>002; LMBA1-002; LMBV4-003</b> | This study; Donald <i>et al.</i> , 2012                                                                                  |
| <i>Phorcus lineatus</i> (13) 100           | JN686331; JN686317;<br>JN686329<br>JN686300;<br>JN686303; KF369166; |                                                                                                                                             | Donald <i>et al.</i> , 2012; Lobo <i>et al.</i> , 2013;<br>Galindo <i>et al.</i> , 2014                                  |
| <i>Phorcus sauciatus</i> (4)               | KC990630                                                            |                                                                                                                                             |                                                                                                                          |
| <i>Scurria bahamondina</i> (1)             | AB238531                                                            |                                                                                                                                             | Nakano & Ozawa, 2007                                                                                                     |
| <i>Siphonaria pectinata</i> (9)            | HQ386635; HQ386652;<br>HQ3886654; HQ386639                          | <b>LMBAG18-001; LMBAG18-002; LMBAG18-003; LMBAP2-001;<br/>LMBAP2-002</b>                                                                    | This study; Kawauchi & Giribet, 2011                                                                                     |

---

| <b>Species name<br/>(no. of specimens)</b> | <b>GenBank accession no.</b> | <b>BOLD ID no.</b>           | <b>source</b>                            |
|--------------------------------------------|------------------------------|------------------------------|------------------------------------------|
| <i>Tectarius striatus</i> (3)              | KC990635                     | <b>LMBT2-001; LMBSM6-006</b> | This study; Galindo <i>et al.</i> , 2014 |
| <i>Tectura virginea</i> (2)                | AB238541                     | <b>LMBV8-001</b>             | This study; Nakano & Ozawa, 2007         |
| <i>Tricolia pullus</i> (1)                 | AM049358                     |                              | Williams & Ozawa, 2006                   |
| <i>Tricolia pullus azorica</i> (2)         |                              | LMBAG10-001; LMBAG10-002     | This study                               |
| <i>Vermetus triquetrus</i> (1)             | KF369193                     |                              | Lobo <i>et al.</i> , 2013                |

---
